# Supplementary material for: Effects of high-impact jumping versus resistance exercise on bone mineral content in children and adolescents: a systematic review and meta-analysis
Source: PeerJ. 2025 Jun 30;13:e19616. doi: 10.7717/peerj.19616 (PMC12225634; doi:10.7717/peerj.19616)
Supplement: Supplemental Information 3 [file peerj-13-19616-s003.xlsx]

## Sheet: Sheet1
LS BMC	JUMP
labels	b.r	SE	t	dfs	prob	CI.L	CI.U	sig
X.Intercept.	2.24915	1.16178	1.93594	4.28233	0.120262	-0.894318	5.39261
duration	-0.0380414	0.0173219	-2.19614	1.37211	0.214414	-0.157015	0.0809325
frequency	-0.198494	0.290617	-0.683009	4.23122	0.530173	-0.98828	0.591292
period	-0.0563062	0.0713581	-0.789065	2.58675	0.495964	-0.305369	0.192757
FN BMC	JUMP
labels	b.r	SE	t	dfs	prob	CI.L	CI.U	sig
X.Intercept.	0.37743	0.0868428	4.34612	3.98047	0.0123261	0.135848	0.619011	*
duration	-0.00495129	0.00172949	-2.86286	1.68874	0.125009	-0.0138748	0.00397218
frequency	-0.0488245	0.0194994	-2.5039	3.54138	0.0745689	-0.105844	0.00819495
period	-0.00499248	0.00225707	-2.21193	2.65893	0.125295	-0.012726	0.00274099
WB BMC	JUMP
labels	b.r	SE	t	dfs	prob	CI.L	CI.U	sig
X.Intercept.	134.259	36.9978	3.62883	2.13548	0.0618269	-15.6327	284.15
duration	-1.87028	0.474571	-3.94099	1.25776	0.117644	-5.63861	1.89805
frequency	18.1368	4.29707	4.22074	1.84092	0.0597294	-1.97068	38.2444
period	-12.7431	1.62712	-7.83172	1.62079	0.0280433	-21.5737	-3.91254	*
LS BMC	Resistance
labels	b.r	SE	t	dfs	prob	CI.L	CI.U	sig
X.Intercept.	0.304455	0.142978	2.12938	1.13281	0.255737	-1.07876	1.68767
duration	-0.0119075	0.00319014	-3.7326	1.29327	0.121005	-0.0360467	0.0122317
period	0.0627589	0.0116972	5.3653	1.29327	0.0772392	-0.0257516	0.151269
FN BMC	Resistance
labels	b.r	SE	t	dfs	prob	CI.L	CI.U	sig
X.Intercept.	-0.0166579	0.011738	-1.41914	1.09719	0.375406	-0.137937	0.104621
duration	0.000271707	0.000904716	0.300323	1.39399	0.80256	-0.00579097	0.00633438
period	0.00629541	0.00331729	1.89775	1.39399	0.250144	-0.0159344	0.0285252
WB BMC	Resistance
labels	b.r	SE	t	dfs	prob	CI.L	CI.U	sig
X.Intercept.	137.369	15.3471	8.95081	1.30549	0.0394576	23.0715	251.666	*
duration	-1.68047	0.240782	-6.97923	1.65767	0.031923	-2.9511	-0.409848	*
period	-3.83433	0.548149	-6.99505	2.24757	0.0144162	-5.96056	-1.7081	*
*:p＜0.05
